# Supplementary material for: Assessment of climate change impact and difference on the river runoff in four basins in China under 1.5 and 2.0 °C global warming
Source: Copernicus journal article supplement (doi:10.5194/hess-23-4219-2019), 2019-10-21
Supplement: Supplementary file 1 [file hess-23-4219-2019-supplement.zip]

Archive with 7 entries (7 files):
- Supplement-20190902.docx
- fs03.png
- fs01.png
- fs05.png
- fs04.png
- fs02.png
- hess-23-4219-2019-supplement-title-page.pdf
