# Supplementary material for: Assessment of climate change impact and difference on the river runoff in four basins in China under 1.5 and 2.0 °C global warming
Source: Copernicus journal article supplement (doi:10.5194/hess-23-4219-2019), 2019-10-21
Supplement: Supplementary file 1 [file hess-23-4219-2019-supplement.zip › hess-23-4219-2019-supplement-title-page.pdf]

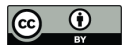

## *Supplement of*

# **Assessment of climate change impact and difference on the river runoff in four basins in China under 1.5 and 2.0°C global warming**

**Hongmei Xu et al.**

*Correspondence to:* Hongmei Xu (xuhm@cma.gov.cn) and Tong Jiang (jiangtong@cma.gov.cn)

- hess-23-4219-2019-supplement-title-page.pdf
- Supplement-20190902.docx
- fs01.png
- fs02.png
- fs03.png
- fs04.png
- fs05.png

The copyright of individual parts of the supplement might differ from the CC BY 4.0 License.
