# Supplementary figures and images for: Assessment of climate change impact and difference on the river runoff in four basins in China under 1.5 and 2.0 °C global warming
Source: Copernicus journal article supplement (doi:10.5194/hess-23-4219-2019), 2019-10-21

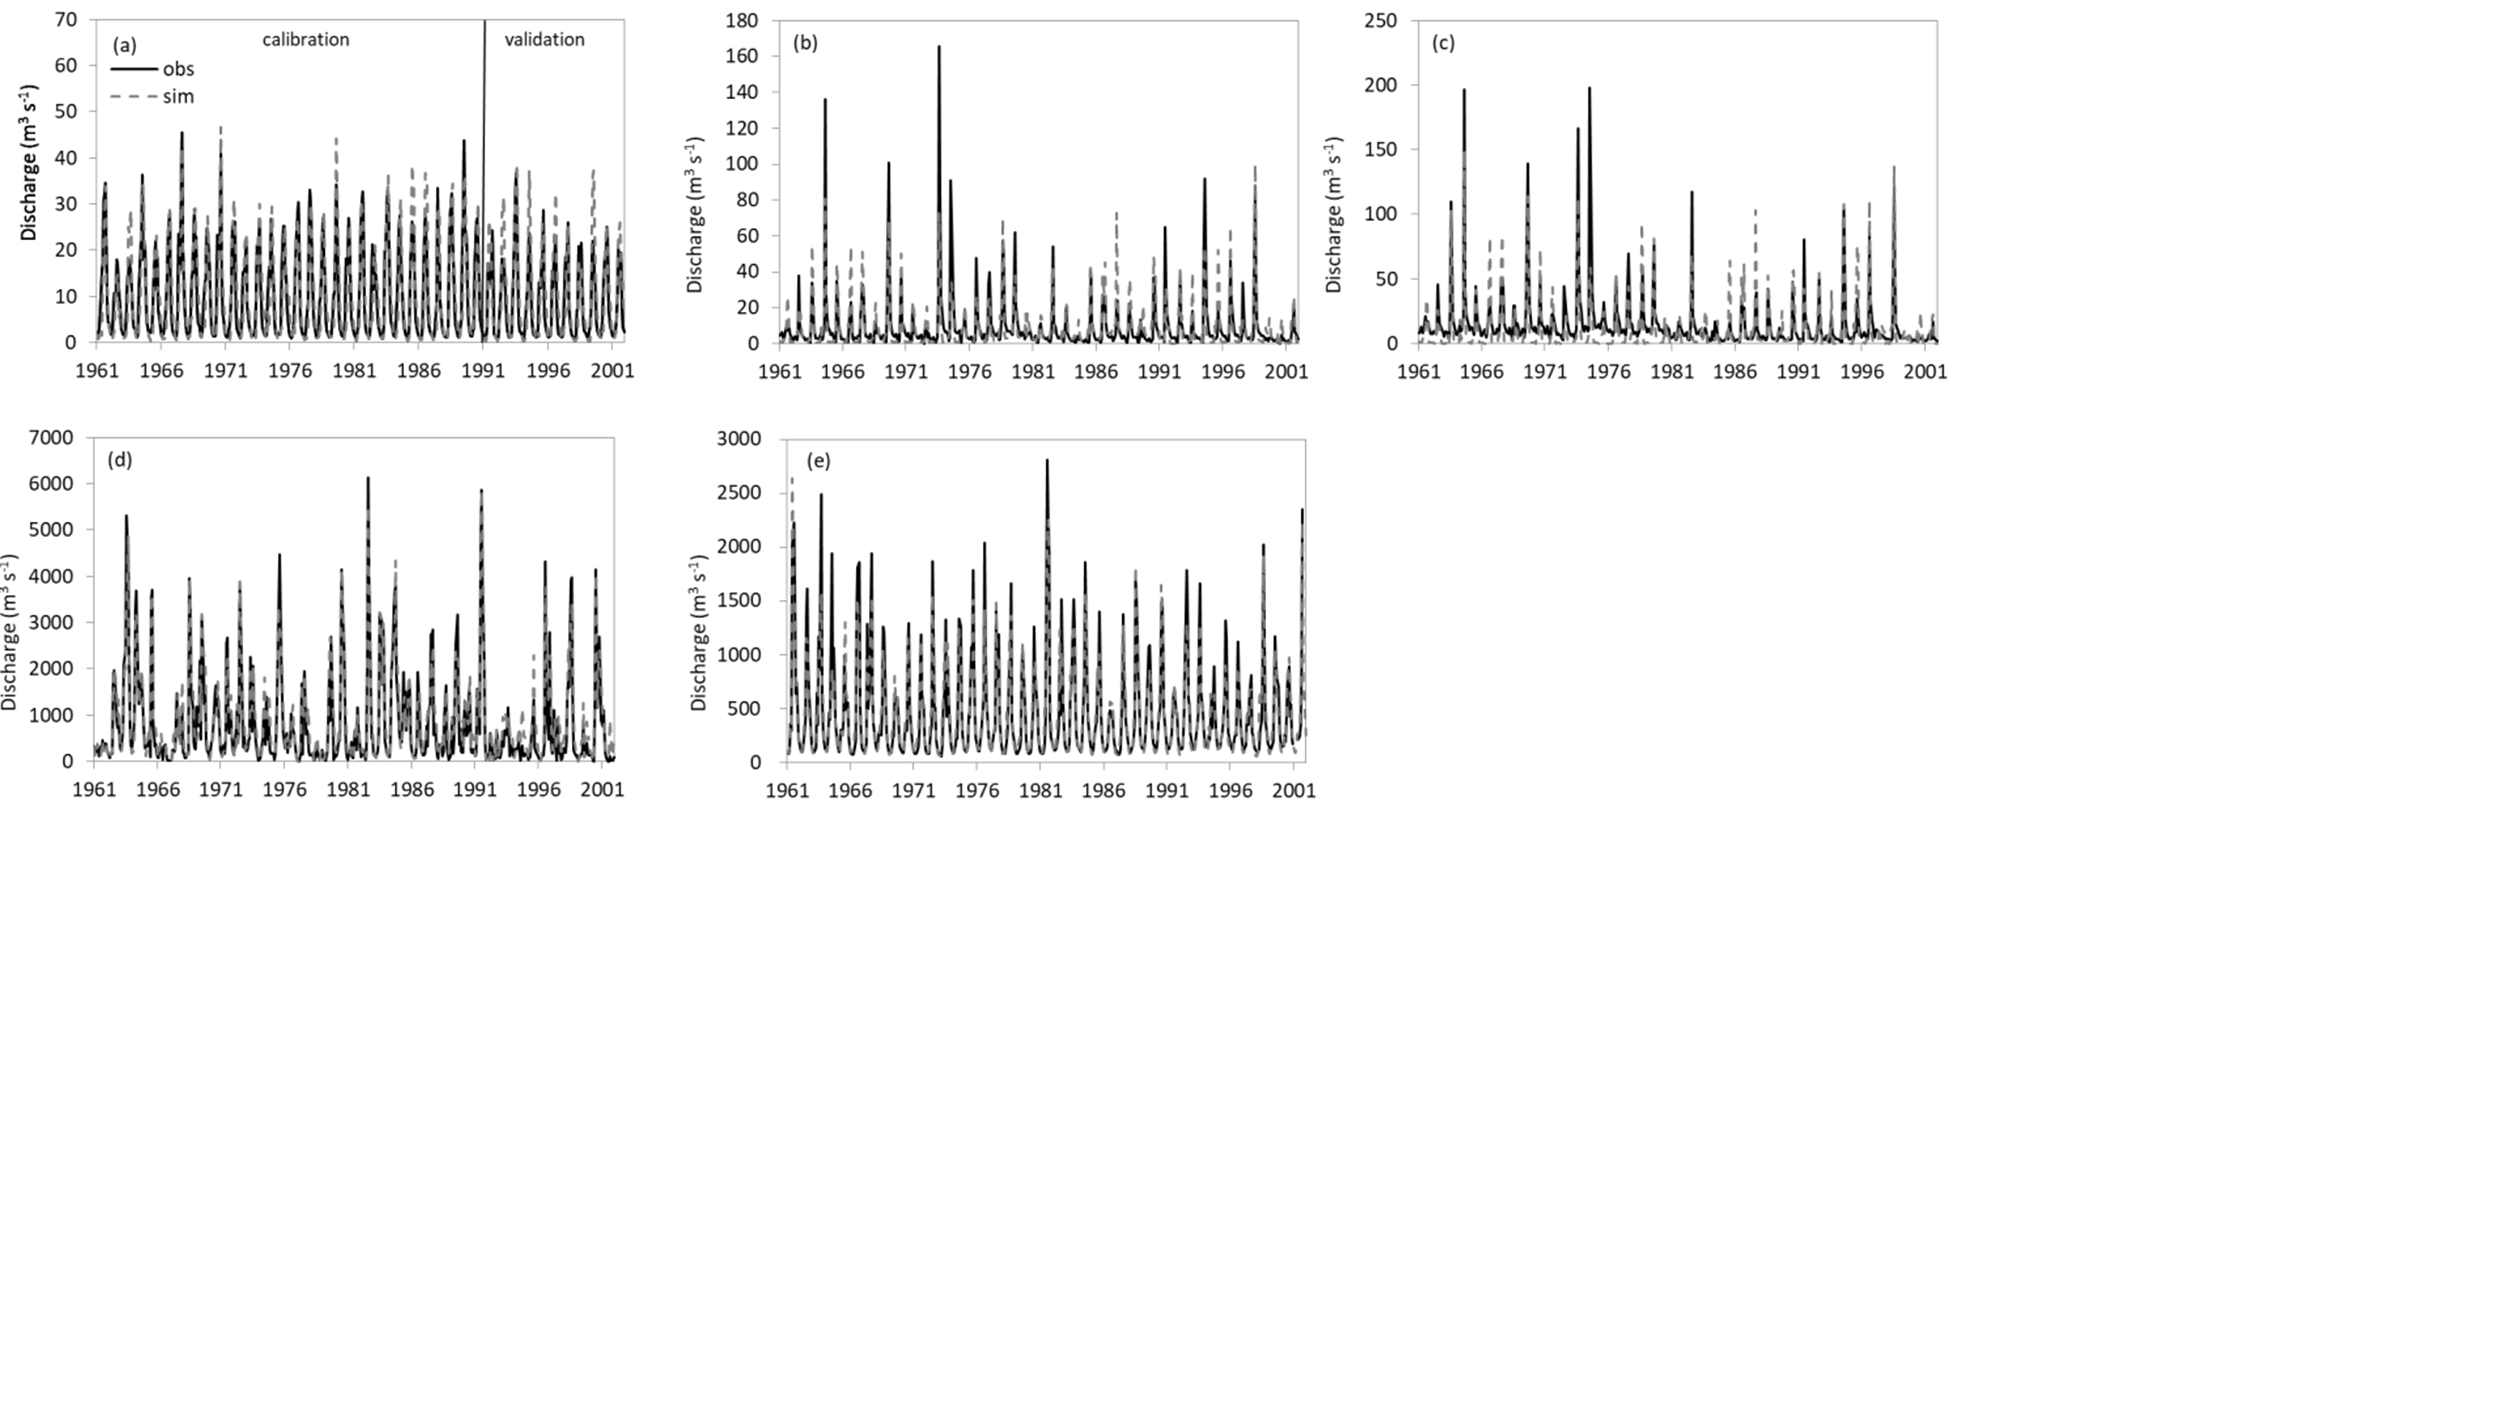

Supplement: Supplementary file 1 [file hess-23-4219-2019-supplement.zip › fs03.png]

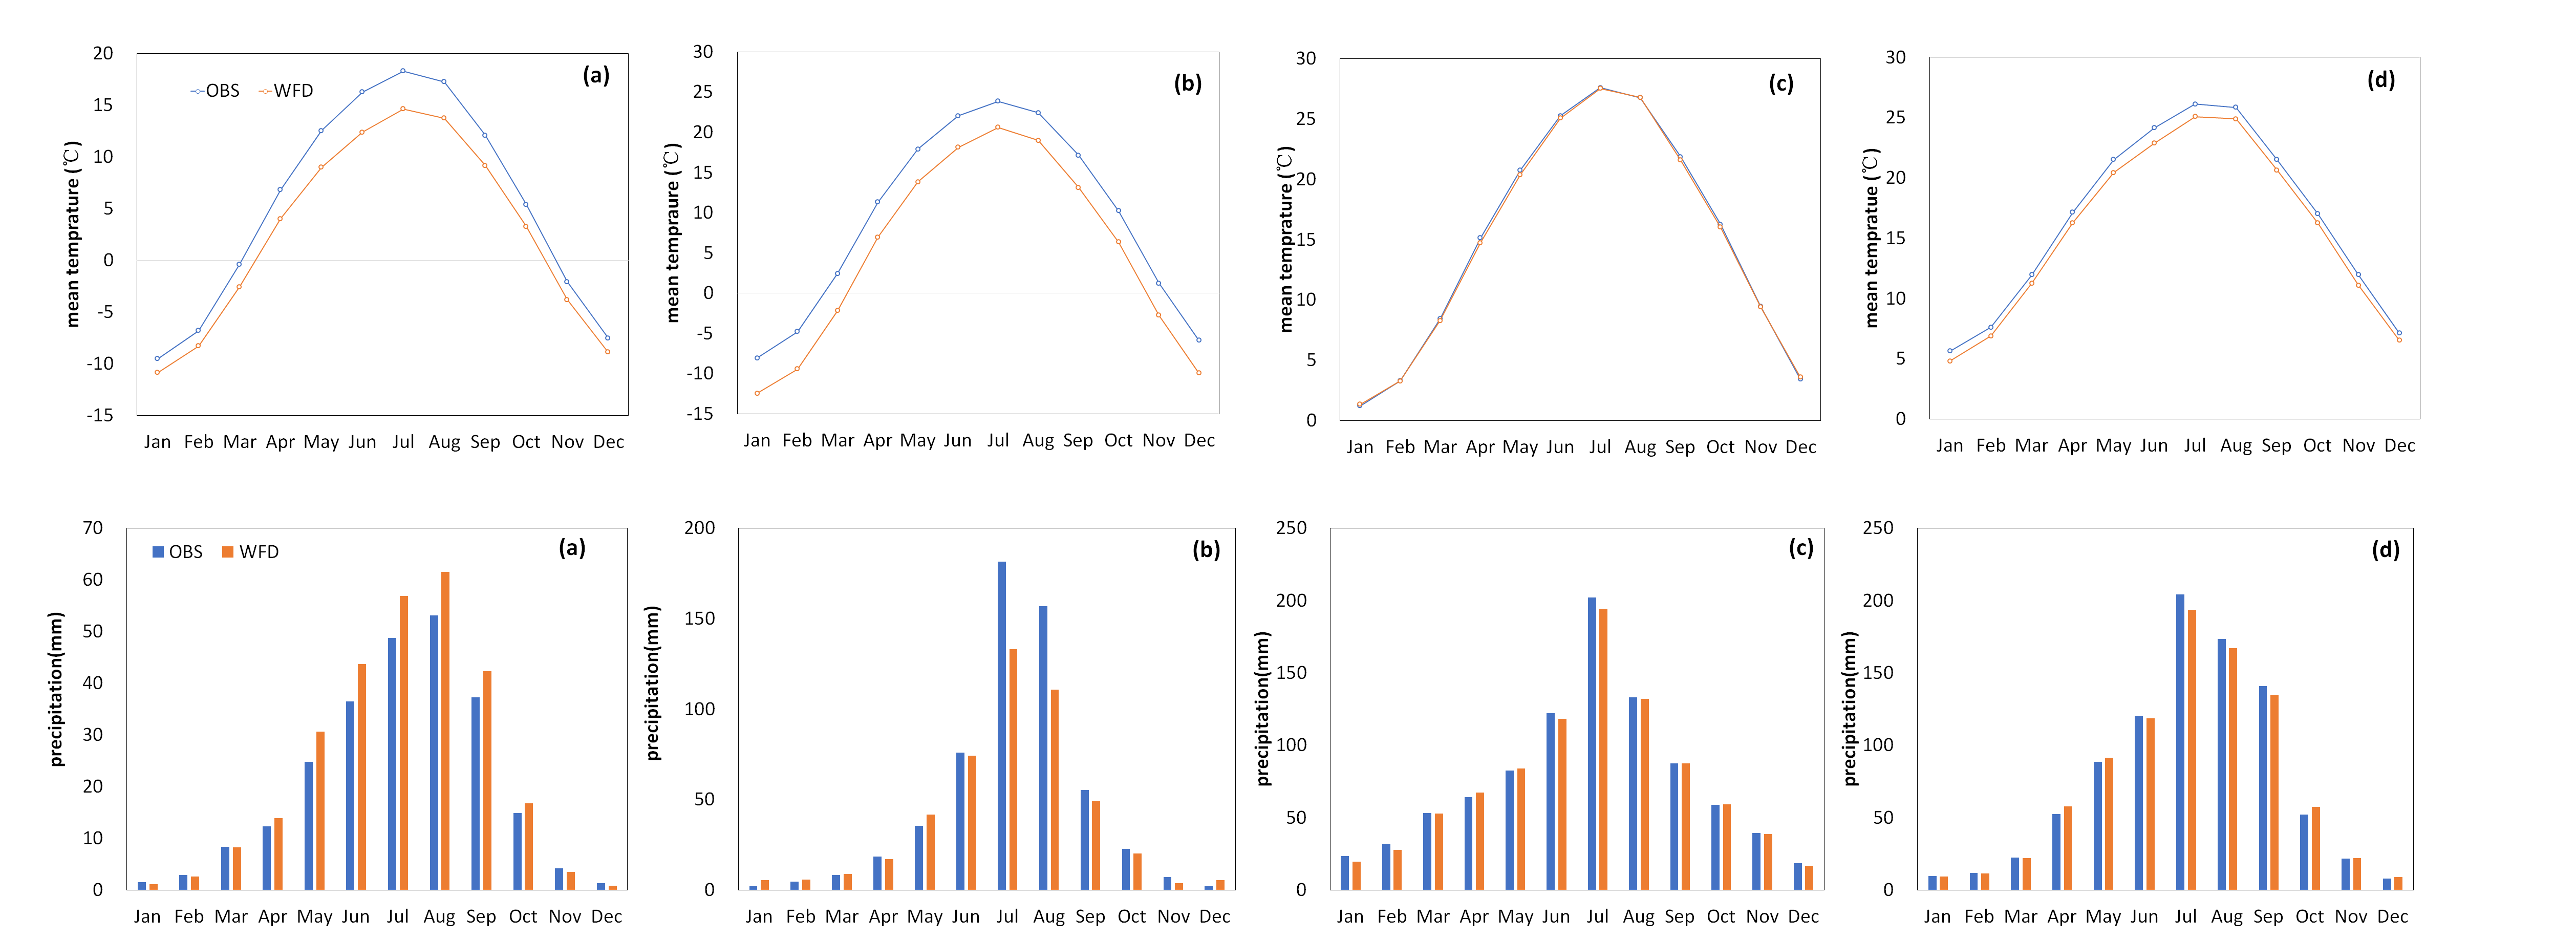

Supplement: Supplementary file 1 [file hess-23-4219-2019-supplement.zip › fs01.png]

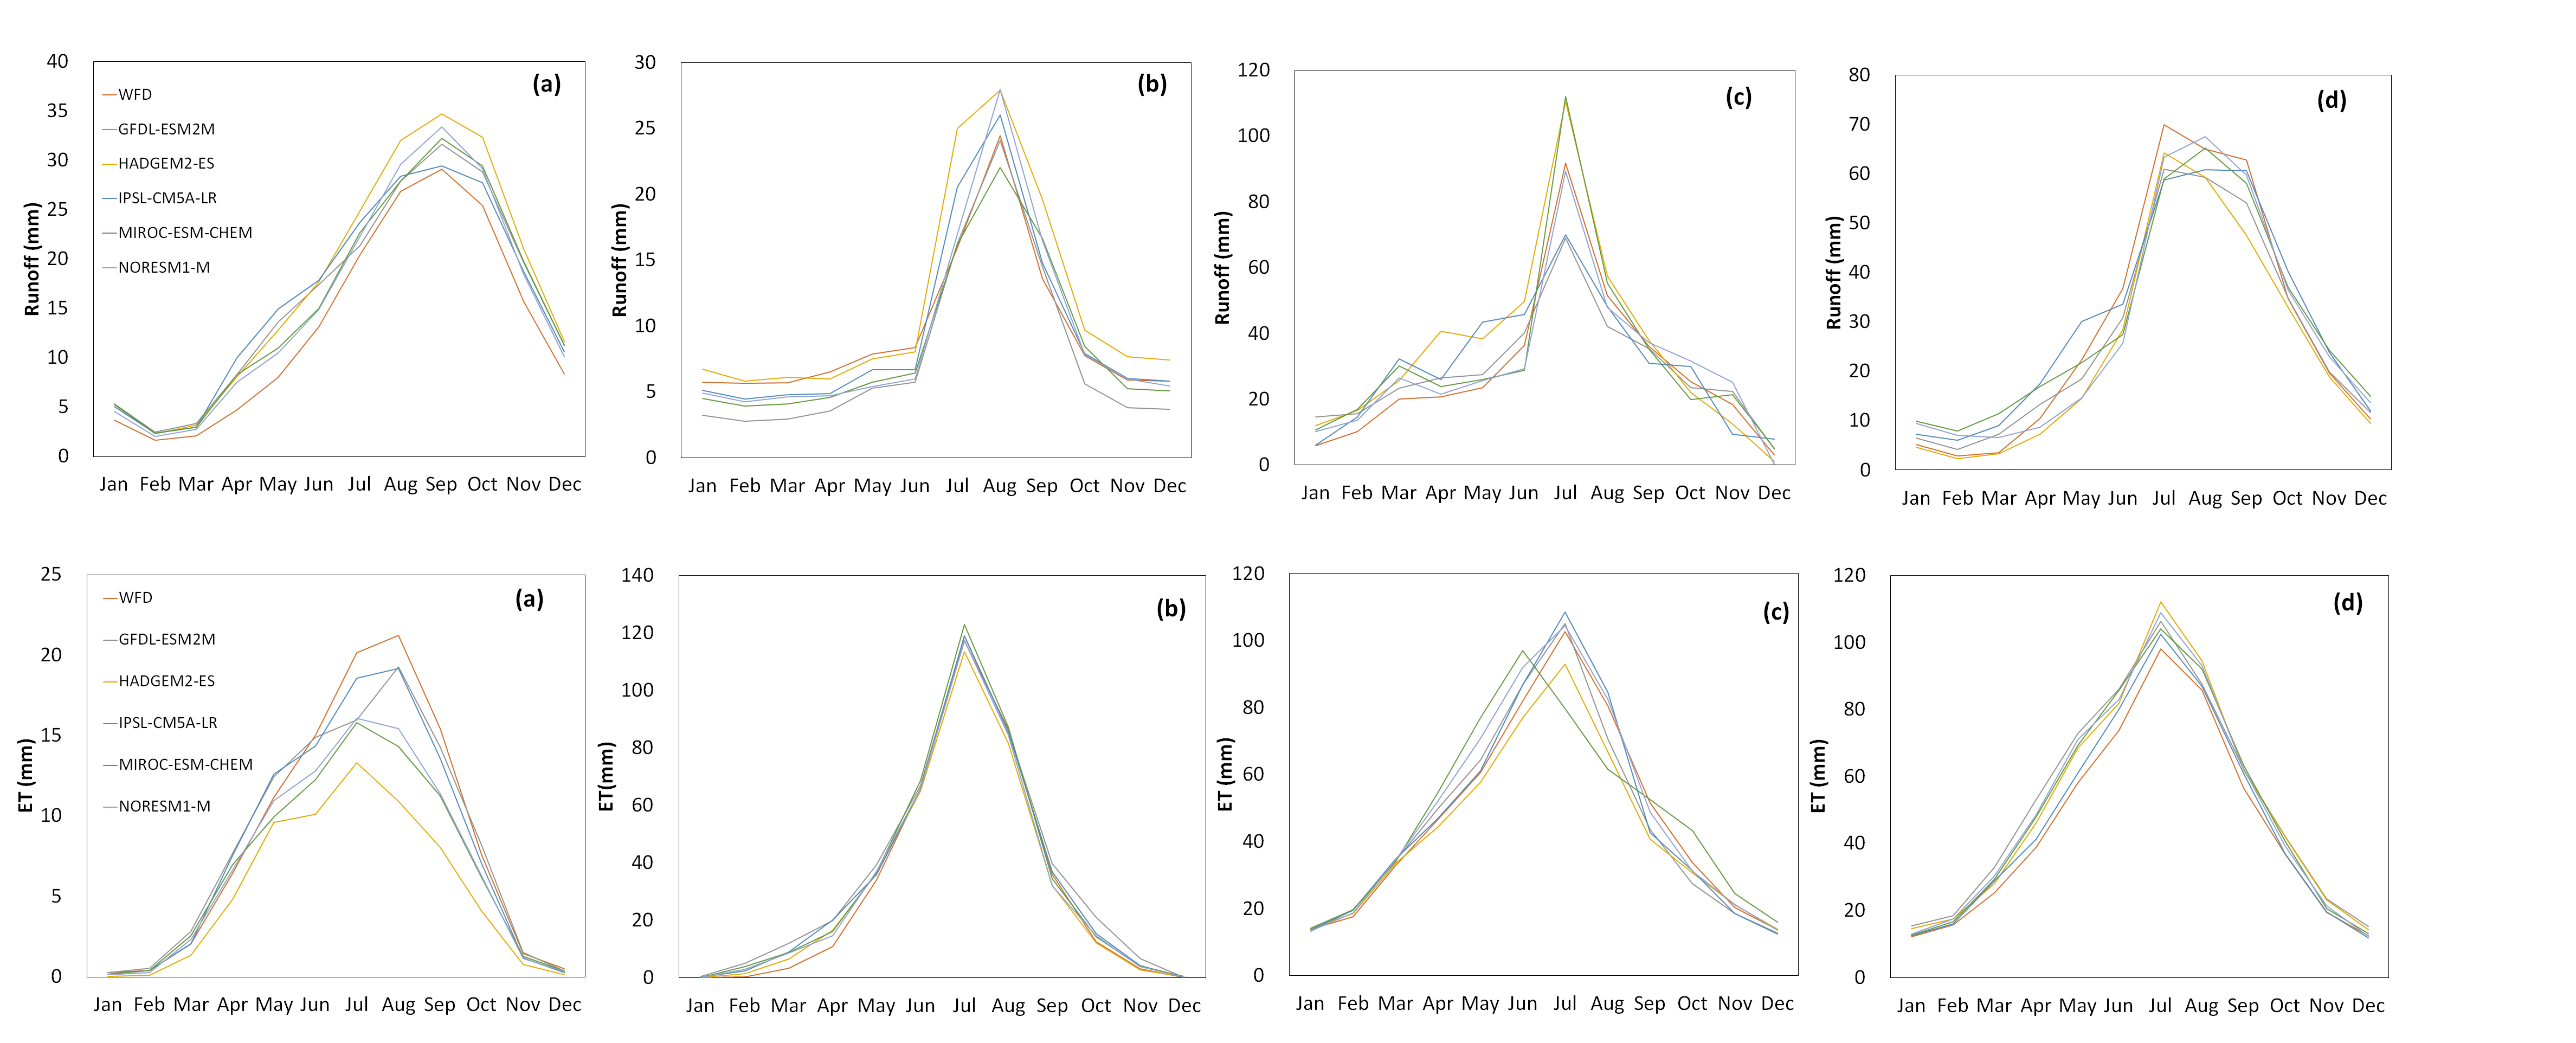

Supplement: Supplementary file 1 [file hess-23-4219-2019-supplement.zip › fs05.png]

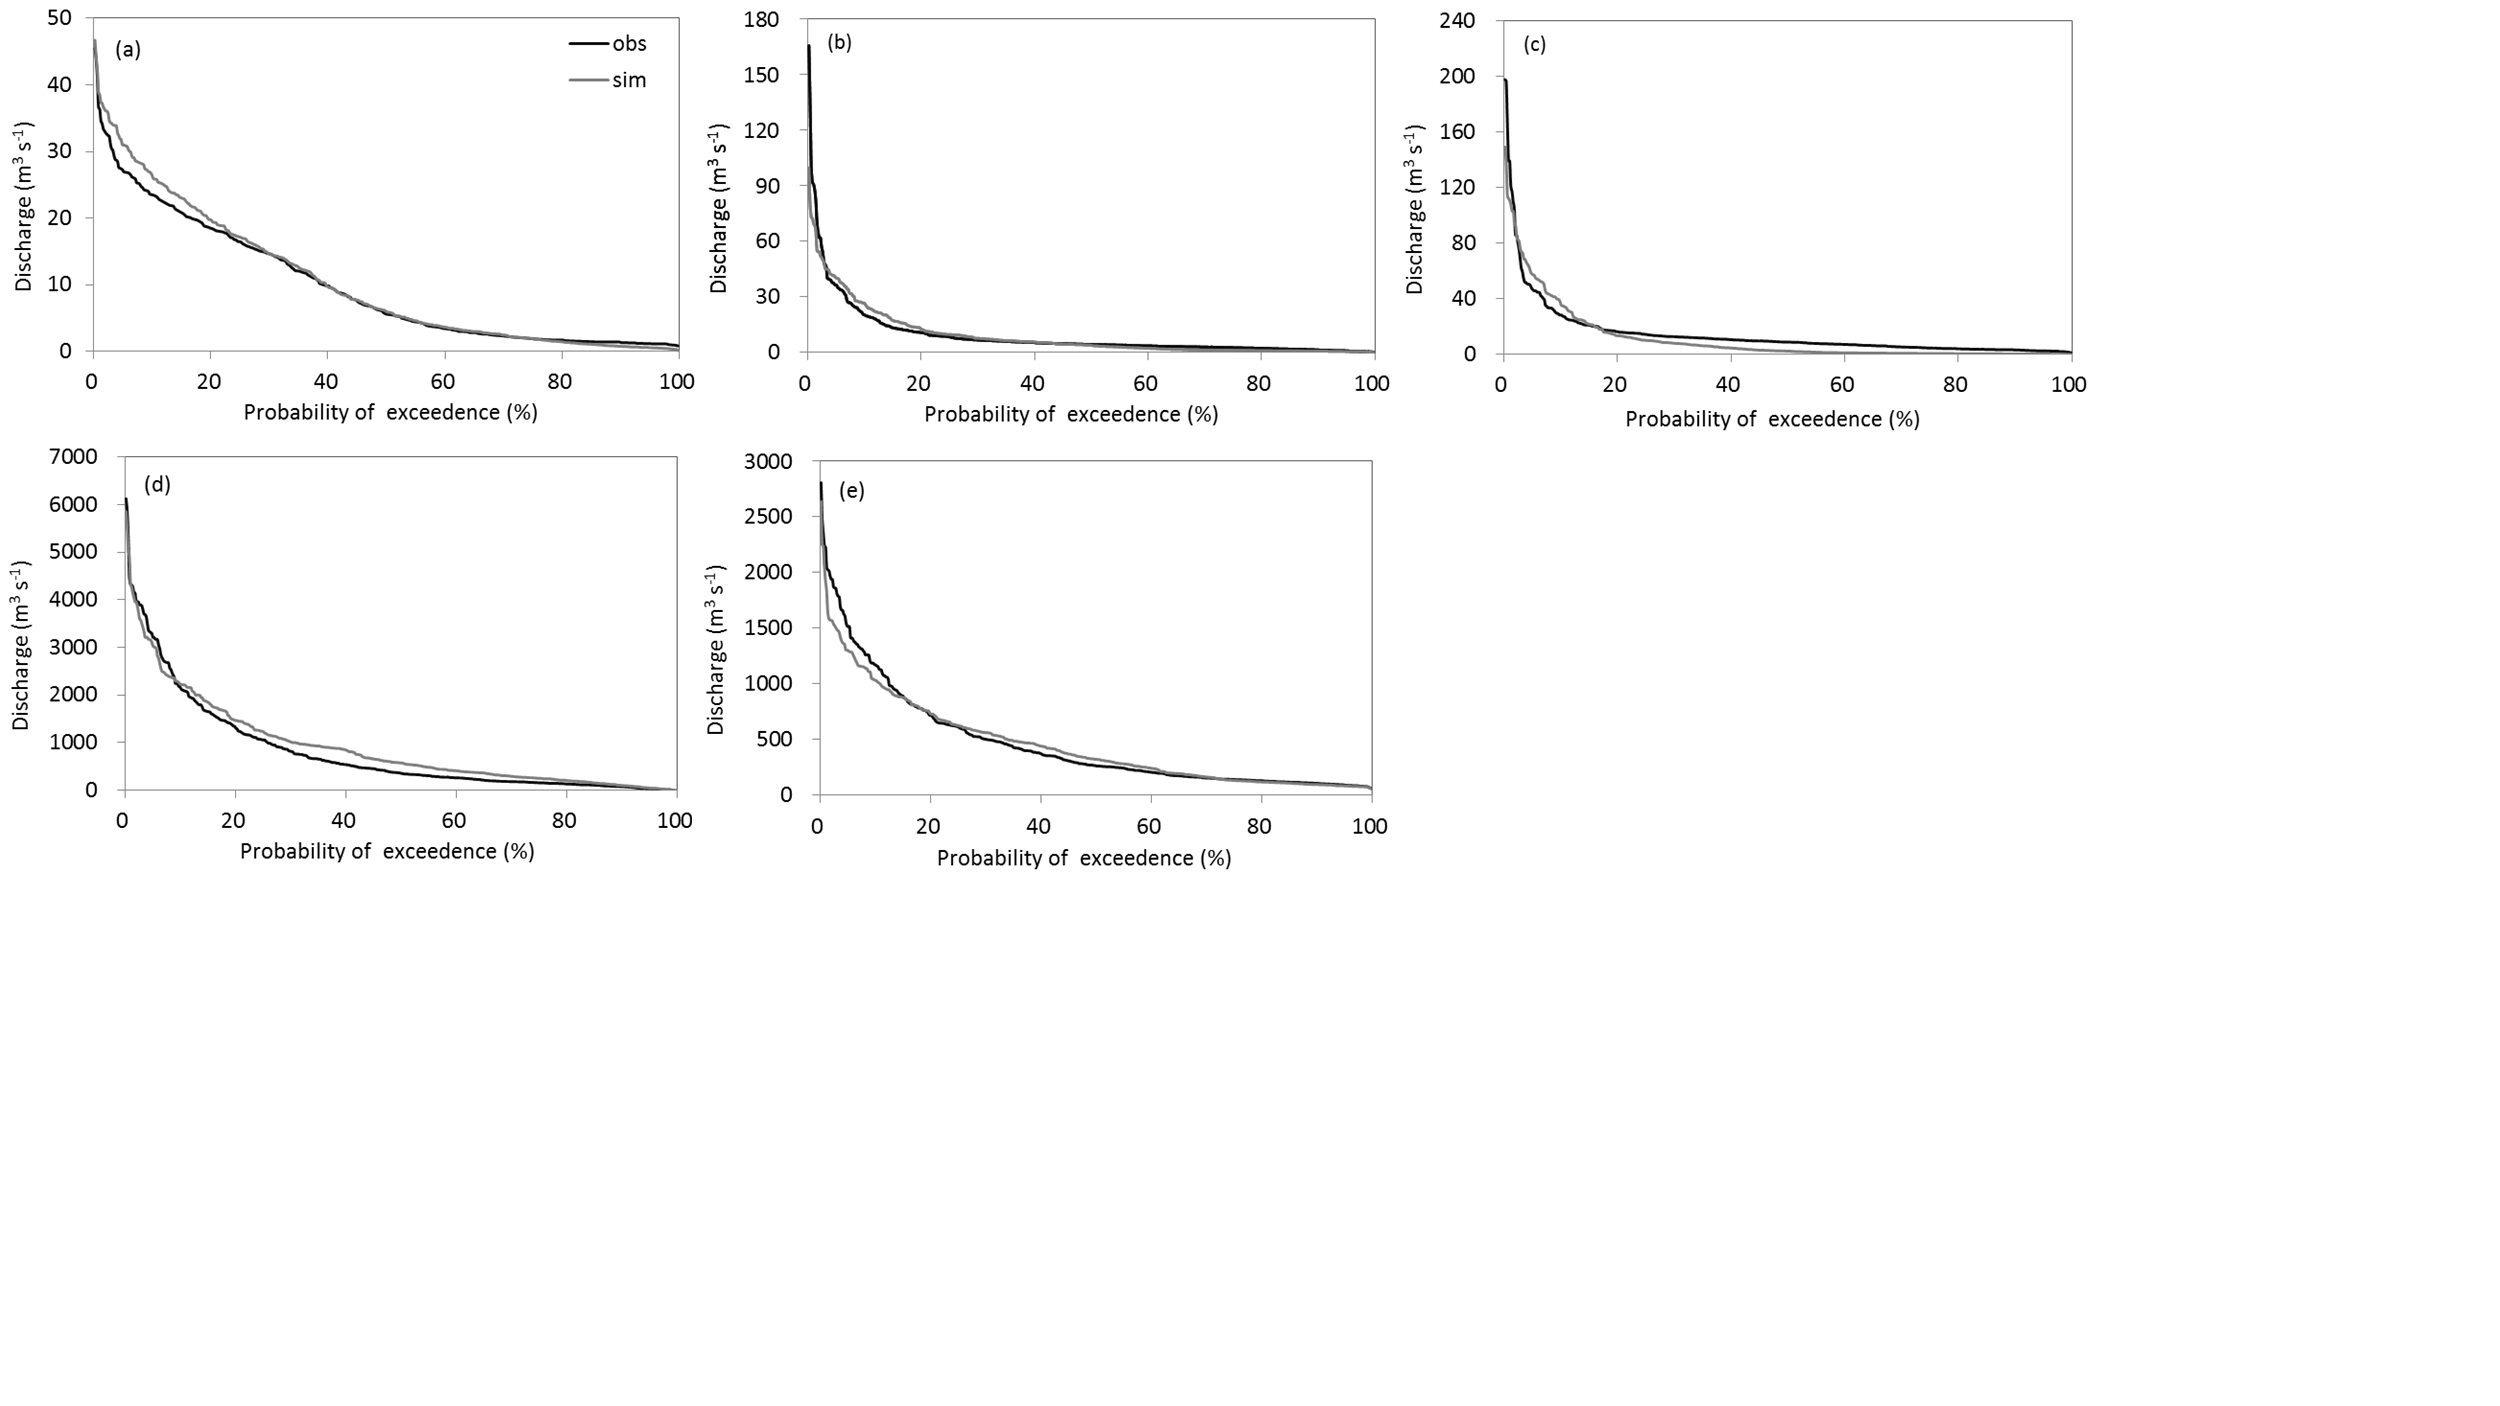

Supplement: Supplementary file 1 [file hess-23-4219-2019-supplement.zip › fs04.png]

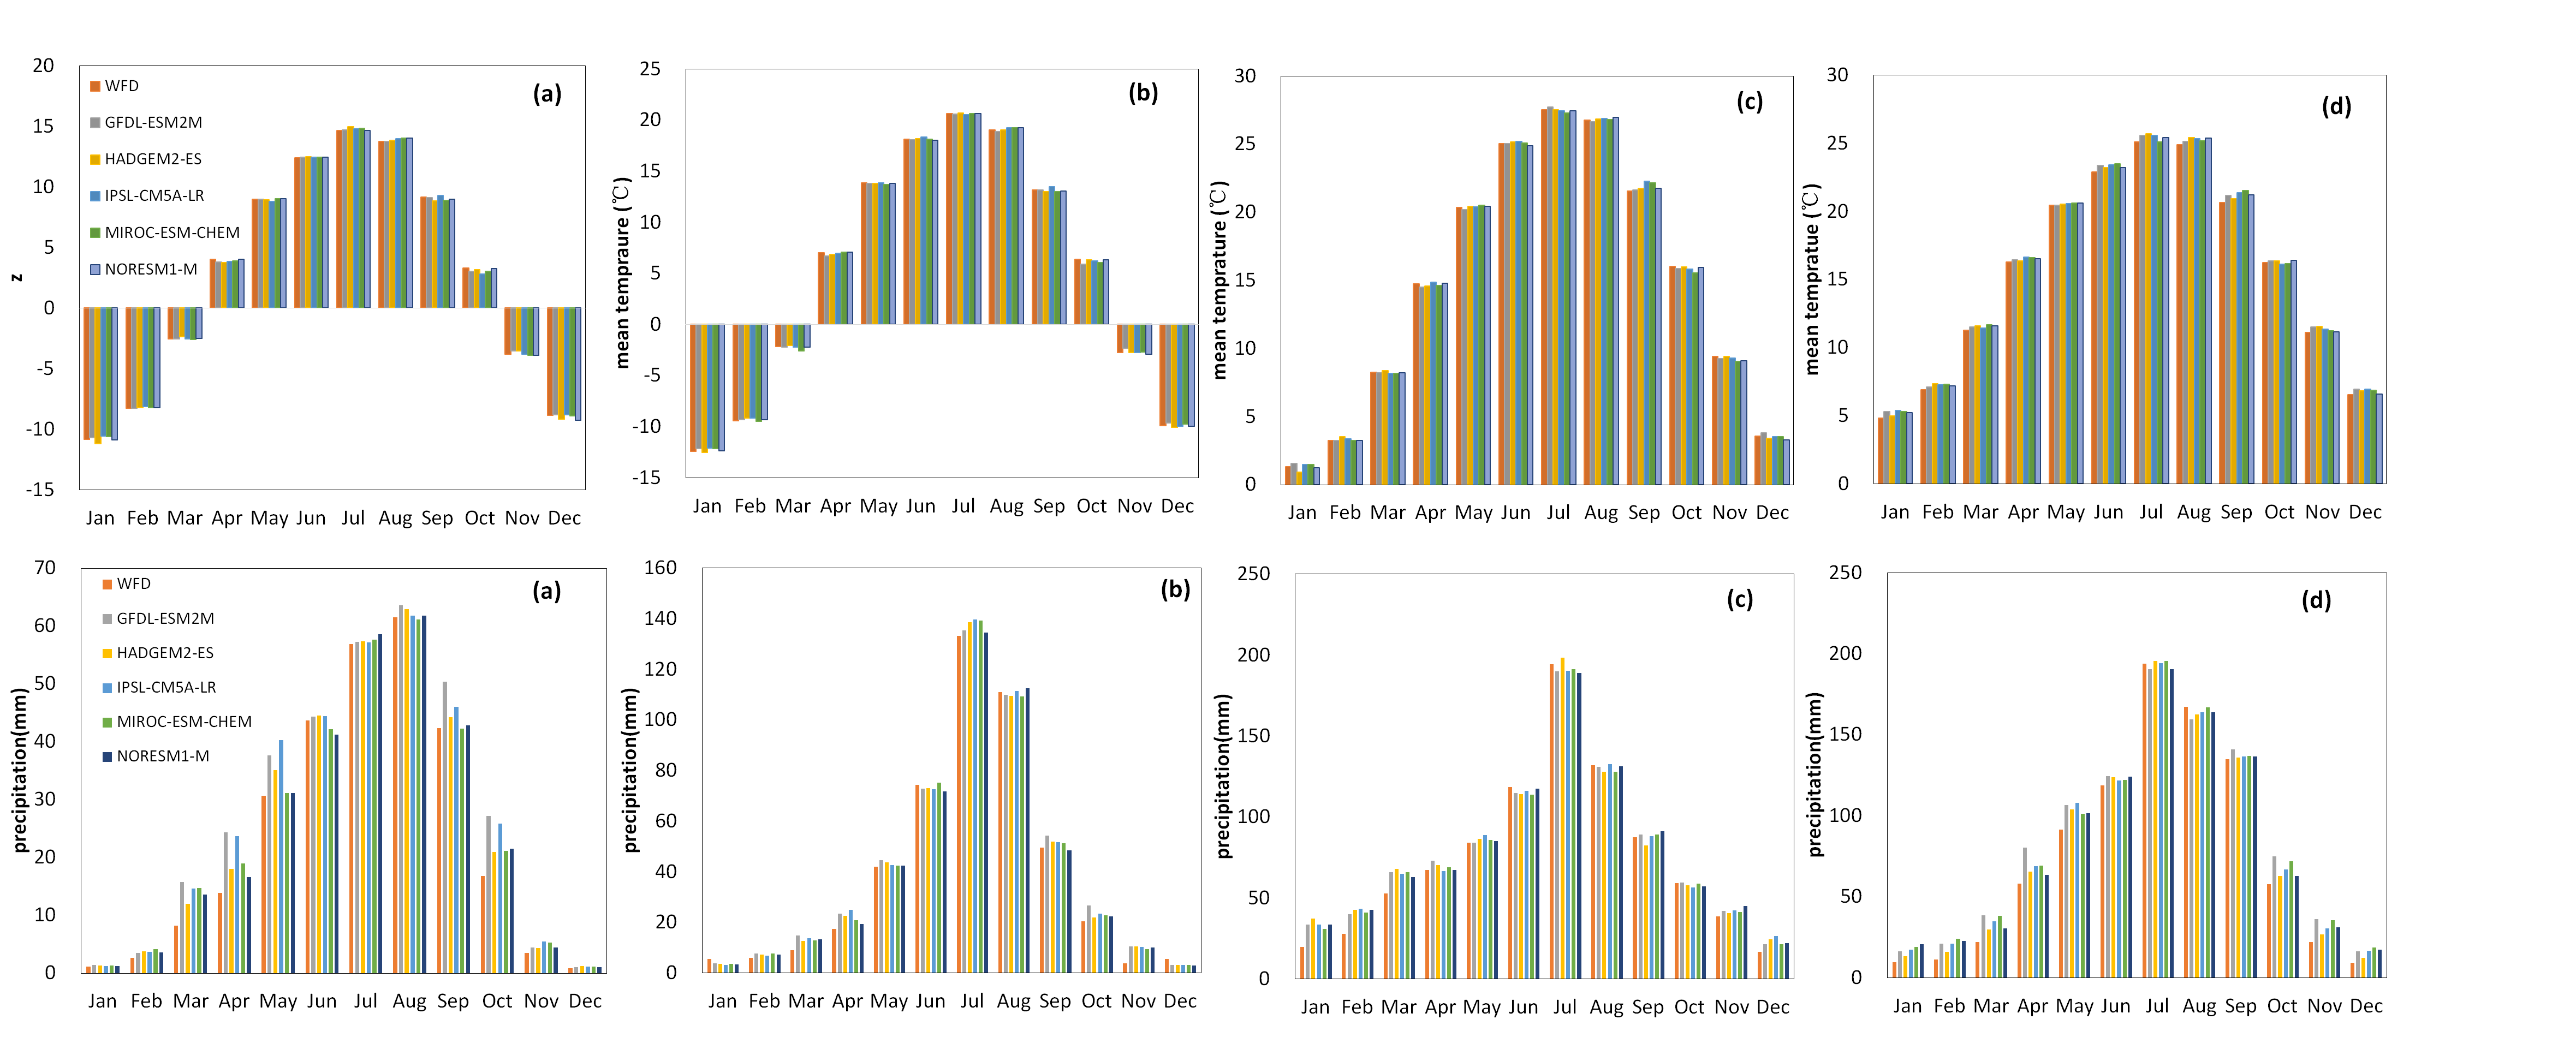

Supplement: Supplementary file 1 [file hess-23-4219-2019-supplement.zip › fs02.png]
